# Supplementary material for: Global seasonal distribution of CH 2 Br 2 and CHBr 3 in the upper troposphere and lower stratosphere
Source: Copernicus journal article supplement (doi:10.5194/acp-22-15049-2022), 2022-11-25
Supplement: Supplementary file 1 [file acp-22-15049-2022-supplement.pdf]

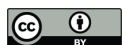

*Supplement of*

## **Global seasonal distribution of $\text{CH}_2\text{Br}_2$ and $\text{CHBr}_3$ in the upper troposphere and lower stratosphere**

**Markus Jesswein et al.**

*Correspondence to:* Markus Jesswein ([jesswein@iau.uni-frankfurt.de](mailto:jesswein@iau.uni-frankfurt.de))

The copyright of individual parts of the supplement might differ from the article licence.

## S1 Upper tropospheric distribution

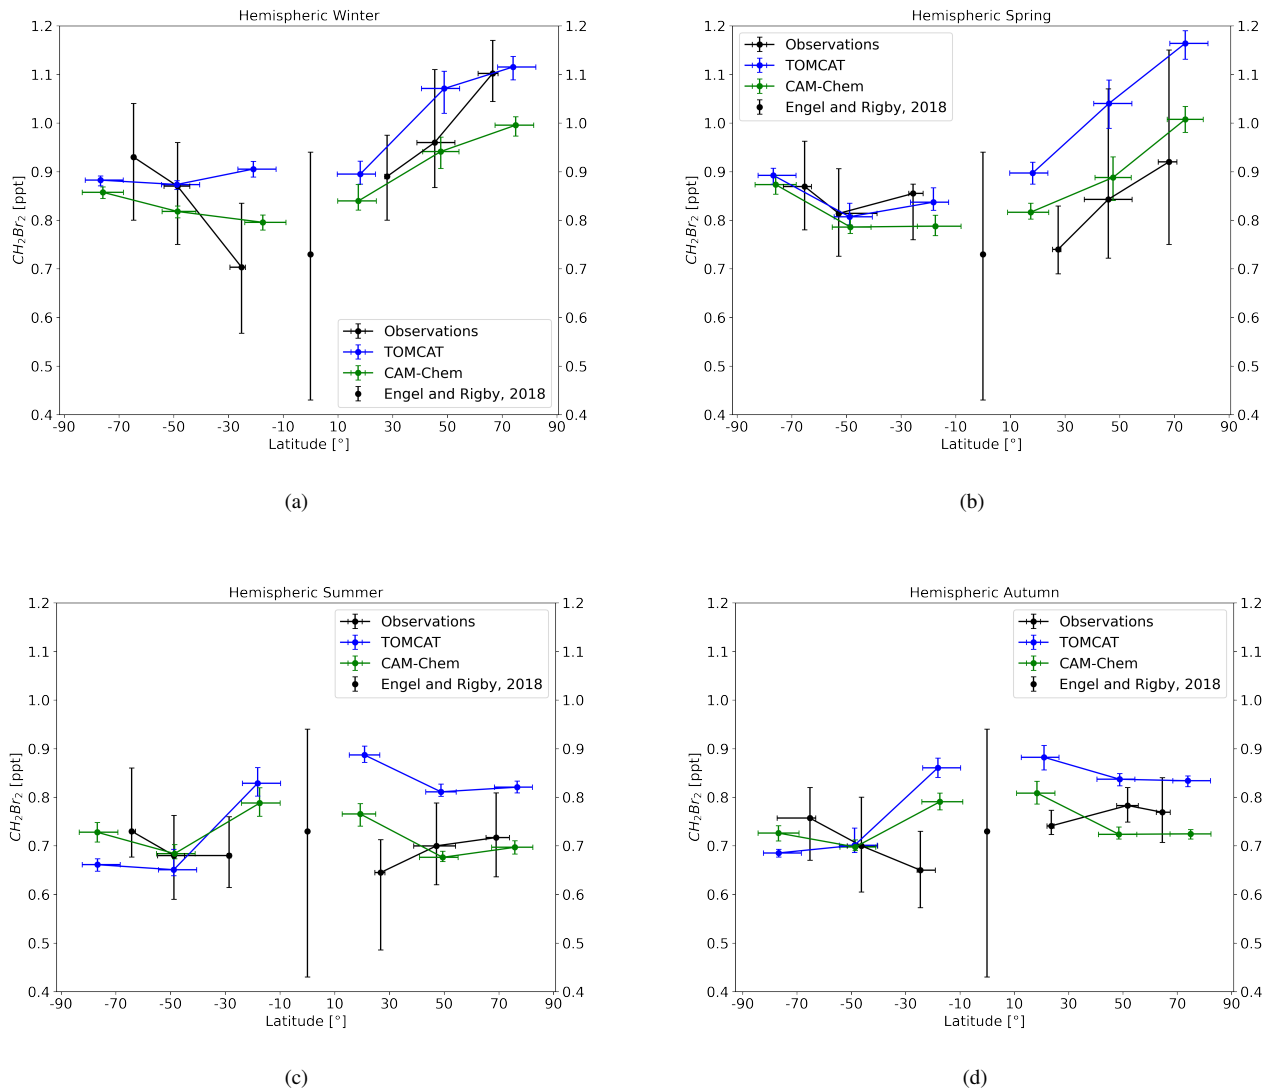

**Figure S1.** Latitude cross section of tropopause representative mixing ratios of  $\text{CH}_2\text{Br}_2$  using all observation (black) and model results (blue for TOMCAT and green for CAM-Chem) for both hemispheres in (a) winter, (b) spring, (c) summer, and (d) autumn. Data are binned into three latitude bins for each hemisphere: high latitudes (90°–60°), mid latitudes (60°–30°), and low latitudes (30°–0°) and only for data within the 10 K below the dynamical tropopause. Latitudinal position of observational and model bins may differ due to different spatial data coverage of observations and models. Also included are the reference mixing ratios for the tropical tropopause (Engel and Rigby, 2018)

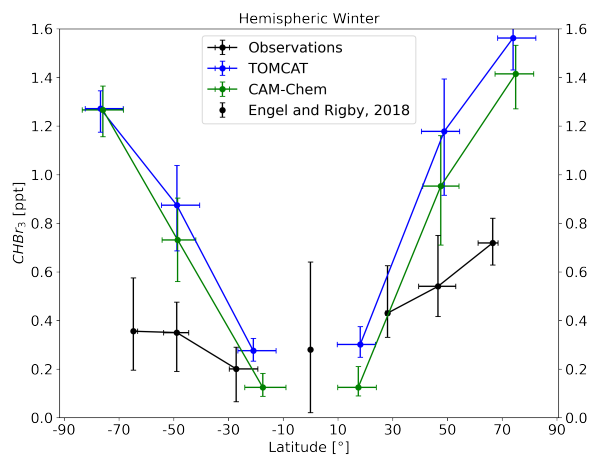

(a)

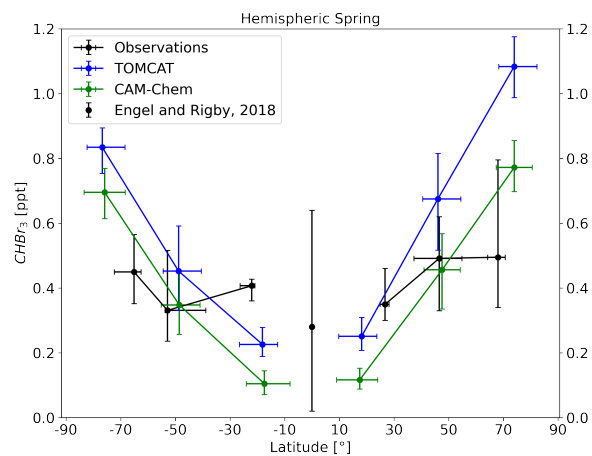

(b)

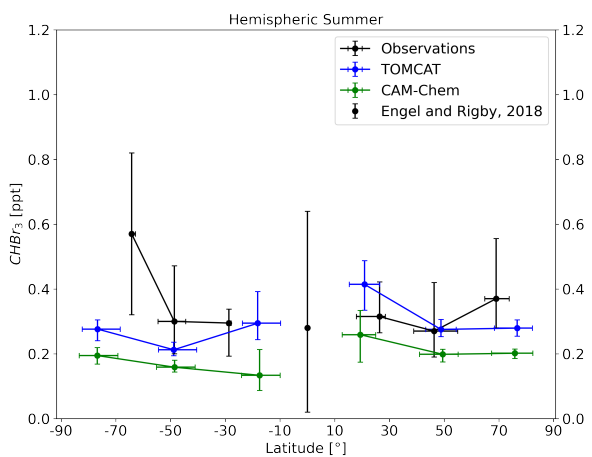

(c)

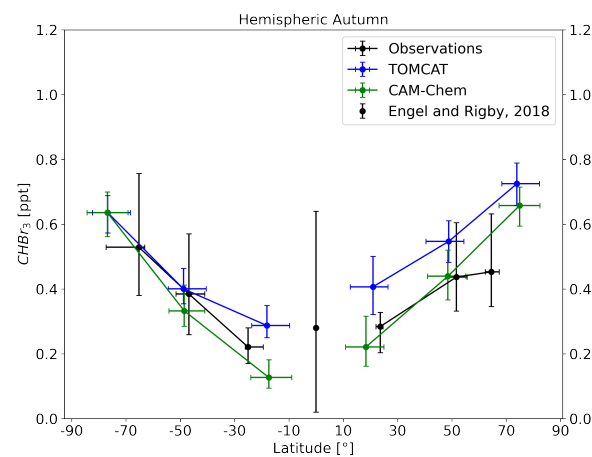

(d)

**Figure S2.** As in Figure S1 but for  $\text{CHBr}_3$ .

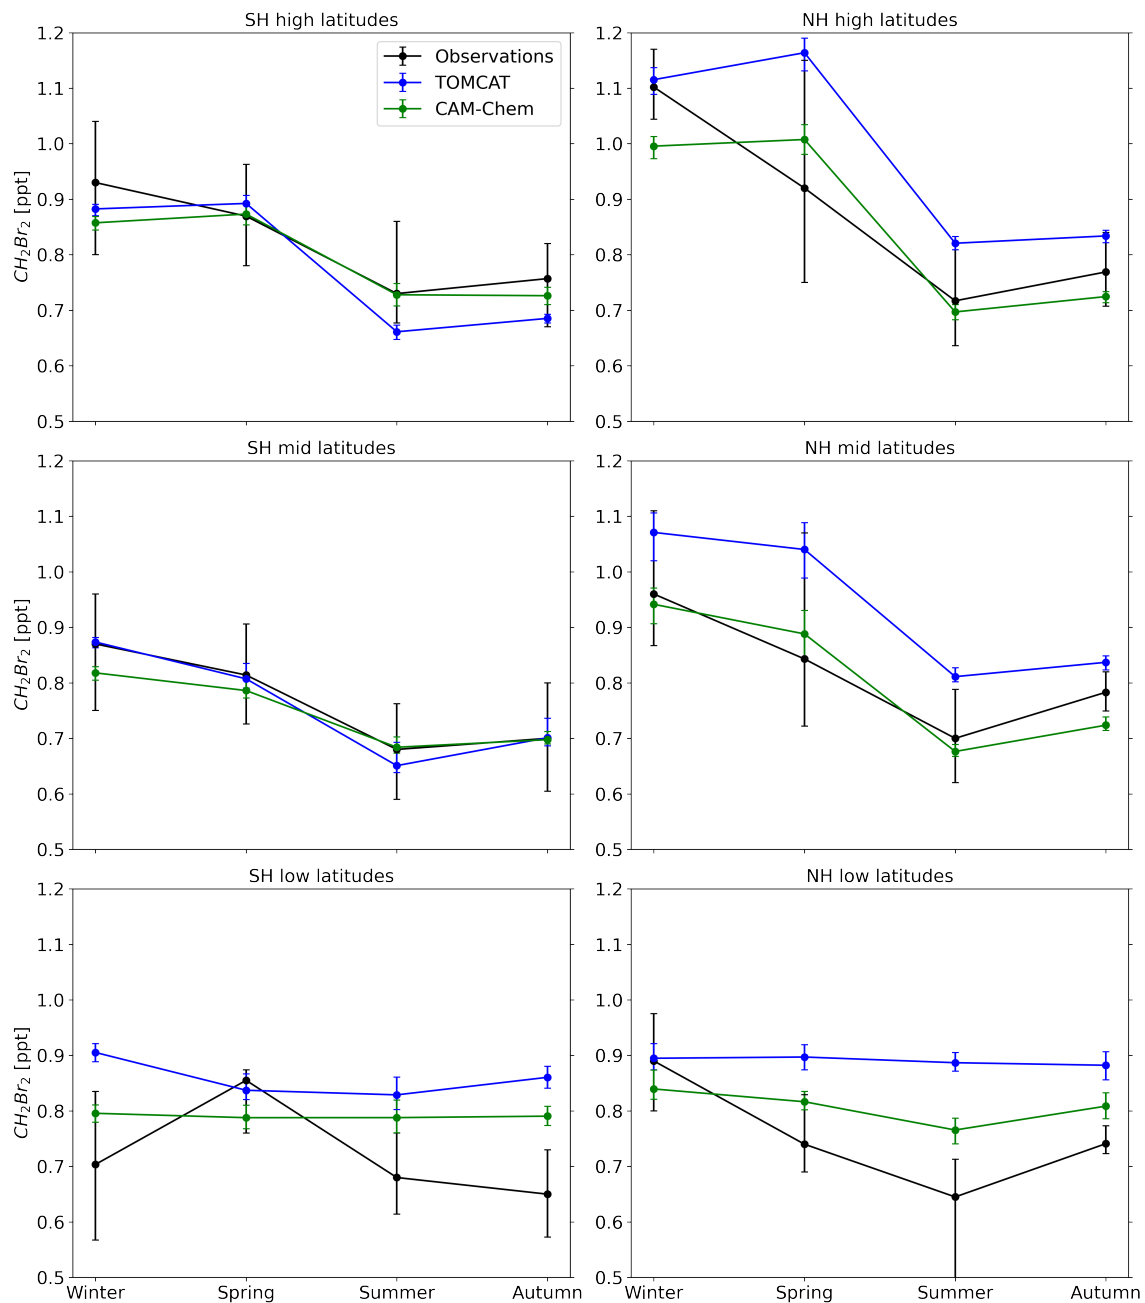

**Figure S3.** Seasonal cycle of CH<sub>2</sub>Br<sub>2</sub> for the three latitudinal bands: high latitudes (90°–60°), mid latitudes (60°–30°), and low latitudes (30°–0°) and only for data within the 10 K below the dynamical tropopause. Observations are presented in black and model results of TOMCAT and CAM-Chem in blue and green, respectively.

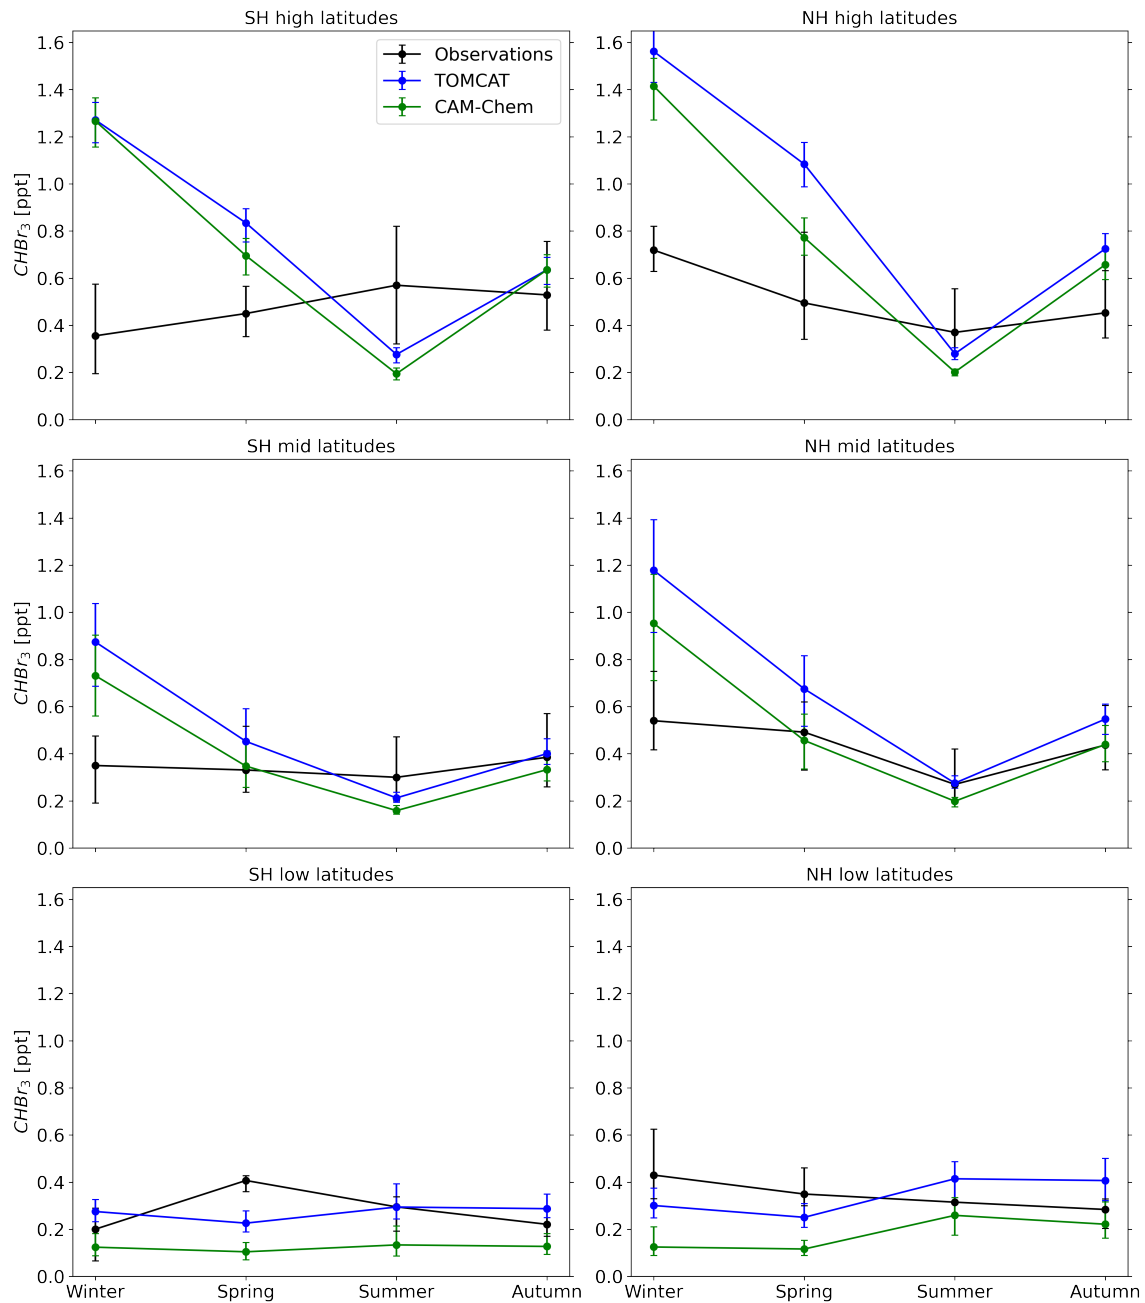

**Figure S4.** As in Figure S3, but for  $\text{CHBr}_3$ .

**Table S1.** Number of observations of CH<sub>2</sub>Br<sub>2</sub> and CHBr<sub>3</sub> at high latitudes (60°-90°), mid latitudes (30°-60°) and low latitudes (0°-30°) in the upper troposphere, e.g. within 10 K below the local dynamical tropopause for the Northern and Southern Hemisphere.

|                                 | Southern Hemisphere |          |          | Northern Hemisphere |          |           |
|---------------------------------|---------------------|----------|----------|---------------------|----------|-----------|
| CH <sub>2</sub> Br <sub>2</sub> | high lat.           | mid lat. | low lat. | low lat.            | mid lat. | high lat. |
| Winter                          | 61                  | 222      | 28       | 51                  | 306      | 207       |
| Spring                          | 128                 | 401      | 42       | 64                  | 286      | 182       |
| Summer                          | 41                  | 172      | 19       | 42                  | 273      | 265       |
| Autumn                          | 130                 | 292      | 35       | 67                  | 270      | 238       |
| CHBr <sub>3</sub>               | high lat.           | mid lat. | low lat. | low lat.            | mid lat. | high lat. |
| Winter                          | 50                  | 182      | 14       | 43                  | 278      | 207       |
| Spring                          | 107                 | 289      | 26       | 52                  | 263      | 171       |
| Summer                          | 39                  | 155      | 18       | 6                   | 186      | 215       |
| Autumn                          | 129                 | 174      | 29       | 67                  | 251      | 233       |

**Table S2.** Median absolute percentage differences (%) of to the respective model to the observational mid latitude vertical profiles (40° - 60° eq. lat\*) in hemispheric spring and autumn. Vertical profiles from 10 K below the dynamic tropopause to the lowermost stratosphere (if not additionally marked otherwise).

|                                 |          | Spring |    | Autumn          |                 |
|---------------------------------|----------|--------|----|-----------------|-----------------|
|                                 |          | SH     | NH | SH              | NH              |
| CH <sub>2</sub> Br <sub>2</sub> | TOMCAT   | 18     | 26 | 25 <sup>a</sup> | 20              |
|                                 | CAM-Chem | 9      | 17 | 15 <sup>a</sup> | 6               |
| CHBr <sub>3</sub>               | TOMCAT   | 21     | 69 | 89 <sup>b</sup> | 22 <sup>b</sup> |
|                                 | CAM-Chem | 26     | 15 | 65 <sup>b</sup> | 26 <sup>b</sup> |

<sup>a</sup> between 0-40 K of  $\Delta\Theta$

<sup>b</sup> between -10-40 K of  $\Delta\Theta$
